# Supplementary material
Source: Springer Nature journal article supplement (https://www.springermedizin.de/resource/supplementary/13045_2013_304_MOESM2_ESM.pdf/9661080)

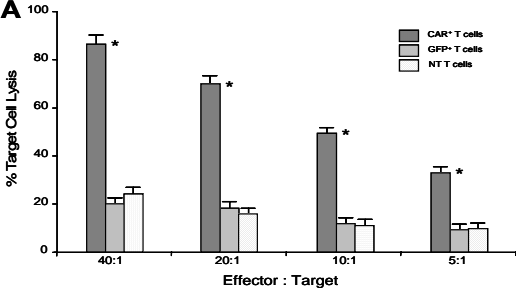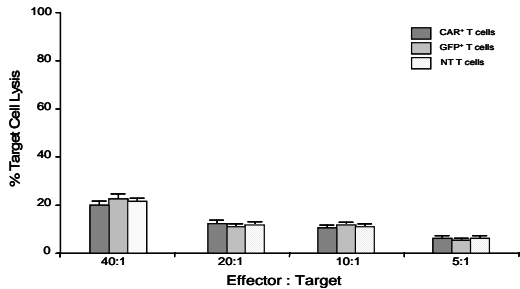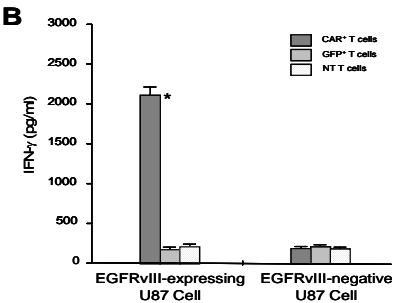

Supplement: MOESM2 [file 9661080]
